# Supplementary material
Source: PubMed Central journal article supplement (PMC8390726)
Supplement: 11606_2021_6916_MOESM1_ESM.pdf [file 11606_2021_6916_MOESM1_ESM.pdf]

**APPENDIX 1: Key Search Terms**

|                                      |            |                             |            |                     |
|--------------------------------------|------------|-----------------------------|------------|---------------------|
| Clinical reason* <b>OR</b>           | <b>AND</b> | Medical student* <b>OR</b>  | <b>AND</b> | Teach* <b>OR</b>    |
| Clinical problem solving <b>OR</b>   |            | Clinical student* <b>OR</b> |            | Learn* <b>OR</b>    |
| Diagnostic thinking <b>OR</b>        |            | Clerk* <b>OR</b>            |            | Educat* <b>OR</b>   |
| Diagnostic problem solving <b>OR</b> |            | Internship* <b>OR</b>       |            | Interven* <b>OR</b> |
| Illness script* <b>OR</b>            |            |                             |            | Develop* <b>OR</b>  |
| Bayesian reason* <b>OR</b>           |            |                             |            | Improve*            |
| Schema <b>OR</b>                     |            |                             |            |                     |
| Pattern recognition <b>OR</b>        |            |                             |            |                     |
| System 1 <b>OR</b>                   |            |                             |            |                     |
| System 2 <b>OR</b>                   |            |                             |            |                     |
| Differential diagnosis <b>OR</b>     |            |                             |            |                     |
| Diagnostic reason* <b>OR</b>         |            |                             |            |                     |
| Forward reason* <b>OR</b>            |            |                             |            |                     |
| Backward reason* <b>OR</b>           |            |                             |            |                     |
| Diagnostic Hypothesis <b>OR</b>      |            |                             |            |                     |
| Problem representation               |            |                             |            |                     |
